# Supplementary material
Source: PubMed Central journal article supplement (PMC6344827)
Supplement: Supplemental_Figures.pdf [file Supplemental_Figures.pdf]

**Figure S1**

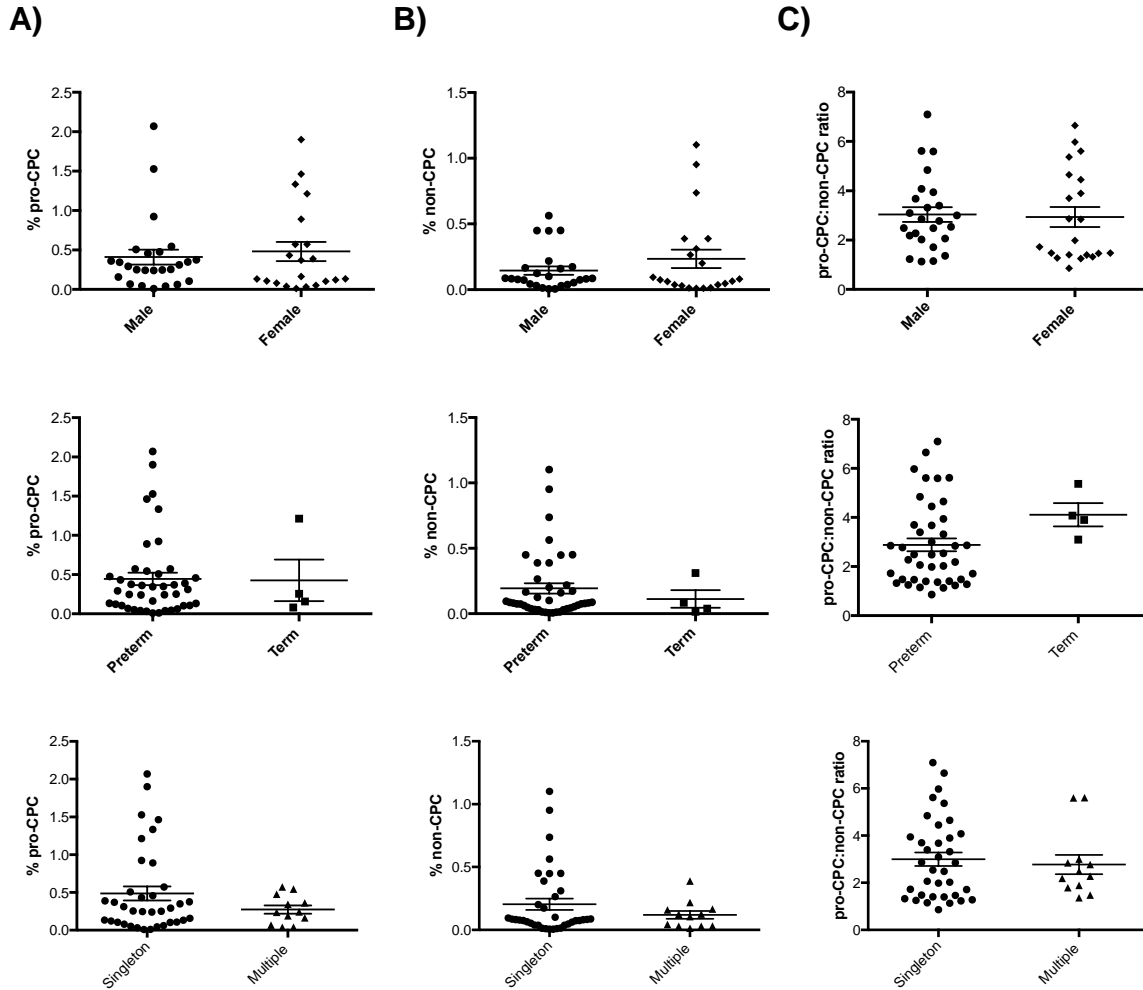

**Figure S1.** A) %Pro-CPC is not impacted by gender (male n=25,  $0.41 \pm 0.04$  vs. female n=21,  $0.48 \pm 0.12$ ,  $p = 0.94$ ), gestational age (preterm n=42,  $0.44 \pm 0.08$  vs. term n=4,  $0.43 \pm 0.26$ ,  $p=0.92$ ) or multiple pregnancy (singleton n=36,  $0.49 \pm 0.09$  vs. multiples n=12,  $0.27 \pm 0.05$ ,  $p=0.55$ ). B) %non-CPC is not impacted by gender (male n=25,  $0.15 \pm 0.03$  vs. female n=21,  $0.23 \pm 0.07$ ,  $p = 0.98$ ), gestational age (preterm n=42,  $0.19 \pm 0.04$  vs. term n=4,  $0.11 \pm 0.07$ ,  $p=0.66$ ) or multiple pregnancy (singleton n=36,  $0.20 \pm 0.05$  vs. multiples n=12,  $0.12 \pm 0.03$ ,  $p=0.83$ ). C) Pro-CPC:non-CPC is not impacted by gender (male n=25,  $3.04 \pm 0.30$  vs. female n=21,  $2.93 \pm 0.40$ ,  $p = 0.61$ ), gestational age (preterm

n=42,  $2.88 \pm 0.26$  vs. term n=4,  $4.11 \pm 0.47$ , p=0.082) or multiple pregnancy (singleton  
n=36,  $2.99 \pm 0.29$  vs. multiples n=12,  $2.78 \pm 0.41$ , p=0.94).

## Figure S2

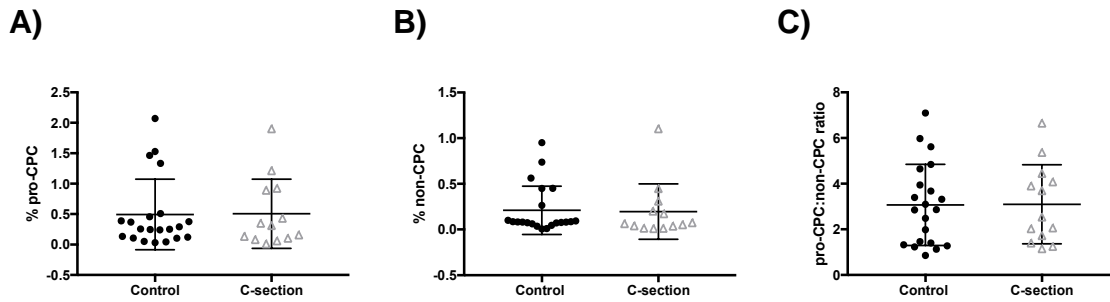

**Figure S2.** C-section does not impact A) %Pro-CPC (labored controls n=21,  $0.49 \pm 0.13$  vs C-section n=13,  $0.51 \pm 0.16$ ,  $p=0.92$ ), B) %non-CPC (labored controls n=21,  $0.21 \pm 0.06$  vs C-section n=13,  $0.20 \pm 0.08$ ,  $p=0.36$ ) or C) Pro-CPC:non-CPC ratio (labored controls n=21,  $3.07 \pm 0.39$  vs C-section n=13,  $3.10 \pm 0.48$ ,  $p=0.86$ ).

**Figure S3**

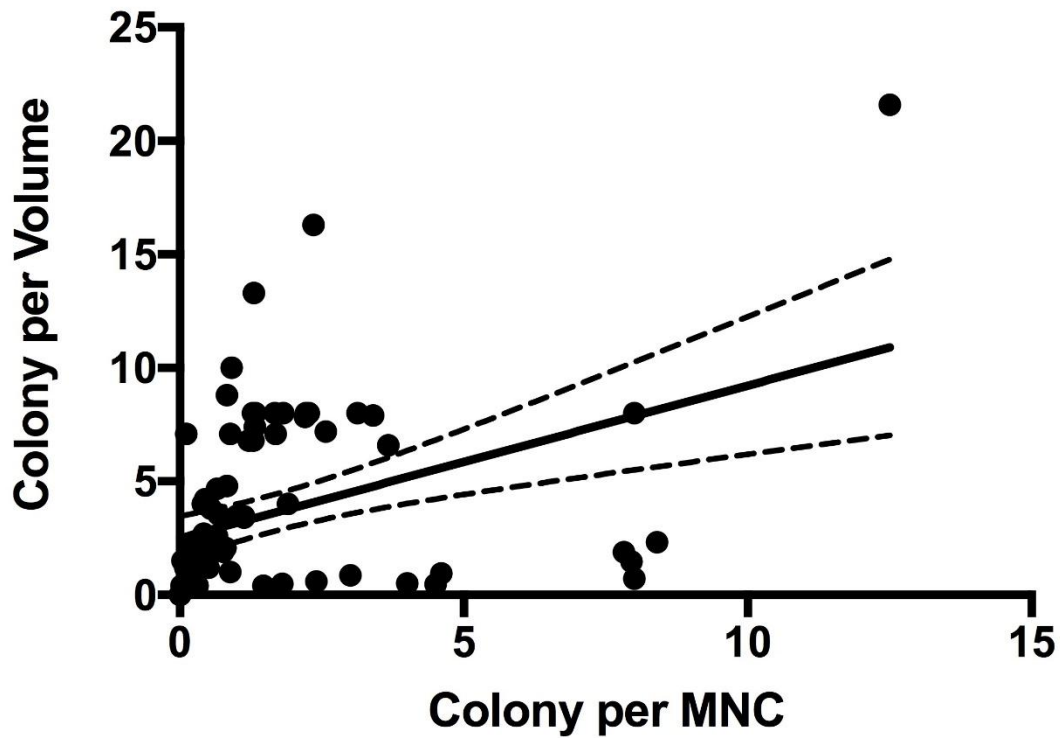

**Figure S3.** A Spearman's rank correlation was used to determine the correlation of colonies per volume vs colonies per MNC. The correlation included control colonies, the results are significant but the correlation is modest ( $n=83$ ,  $p<0.0001$ ,  $R=0.608$ ), the best-fit line (solid) and its 95% confidence intervals (dotted) are shown.

## Figure S4

A)

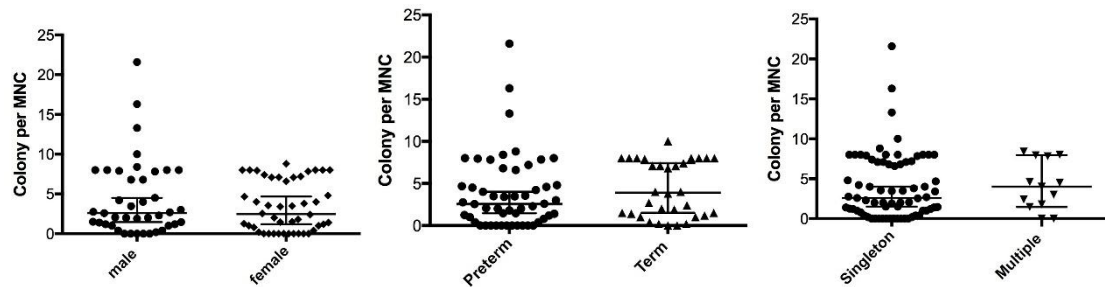

B)

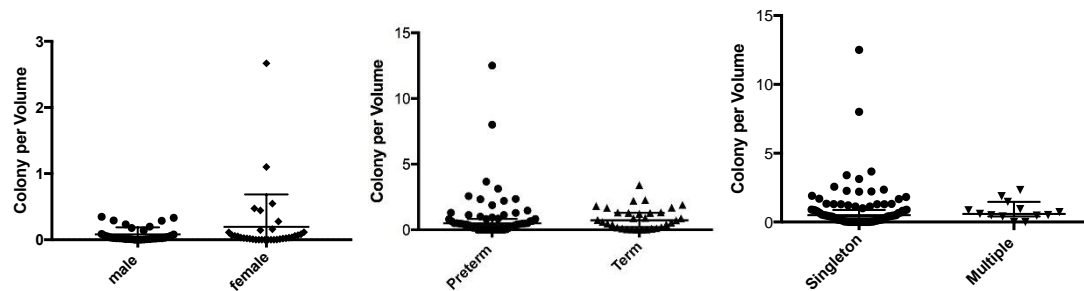

**Figure S4.** A) ECFC colony number per MNC is not affected by gender (male  $n=41$ ,  $4.35 \pm 0.74$  vs. female  $n=46$ ,  $3.43 \pm 0.46$ ,  $p = 0.4503$ ), gestational age (preterm  $n=52$ ,  $3.84 \pm 0.61$  vs. term  $n=32$ ,  $4.33 \pm 0.59$ ,  $p=0.2322$ ) or multiple pregnancy (singleton  $n=71$ ,  $4.00 \pm 0.49$  vs. multiples  $n=13$ ,  $4.15 \pm 0.85$ ,  $p=0.5175$ ). B) ECFC colony number per volume of cord blood collected is also not affected by gender (male  $n=33$ ,  $0.08 \pm 0.11$  vs. female  $n=34$ ,  $0.20 \pm 0.49$ ) gestational age (preterm  $n=52$ ,  $1.12 \pm 0.29$  vs. term  $n=32$ ,  $0.90 \pm 0.14$ ,  $p=0.4070$ ), or multiple pregnancy (singleton  $n=71$ ,  $1.08 \pm 0.22$  vs. multiples  $n=13$ ,  $0.82 \pm 0.19$ ,  $p=0.7390$ ).

**Figure S5**

A)

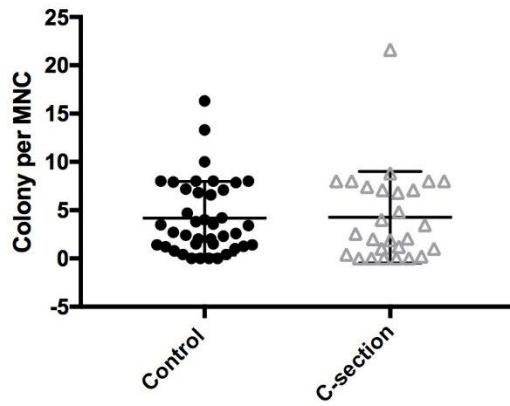

B)

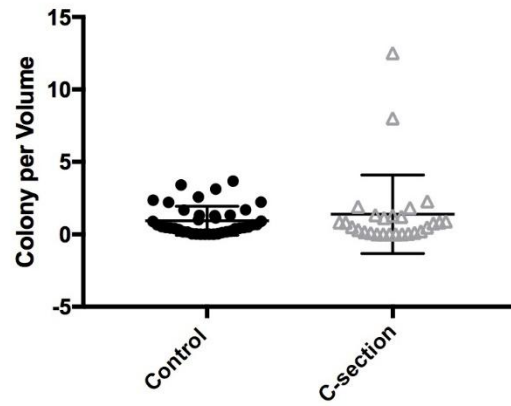

**Figure S5.** C-section does not impact ECFC colony number per MNC (labored controls n=40,  $4.18 \pm 0.61$  vs C-section n=27  $4.27 \pm 0.91$ ,  $p=0.7480$ ) or ECFC colony number per volume (labored controls n=40,  $0.94 \pm 0.16$  vs C-section n=27,  $1.39 \pm 0.52$ ,  $p=0.7195$ ).
